# Supplementary material
Source: PubMed Central journal article supplement (PMC4620525)
Supplement: Supp_Figure1.pdf [file Supp_Figure1.pdf]

## Supplementary Data

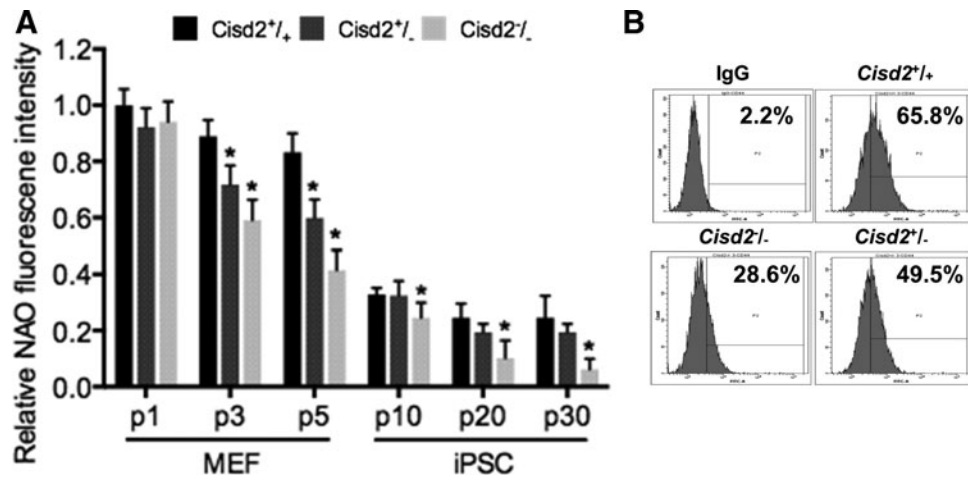

**SUPPLEMENTARY FIG. S1.** Evaluation of mitochondrial masses in *Cisd2*-deficient cells (MEFs and miPSCs) compared with *Cisd2*<sup>+/+</sup> counterpart cells.
