# Supplementary material
Source: PubMed Central journal article supplement (PMC4620525)
Supplement: Supp_Table1.pdf [file Supp_Table1.pdf]

SUPPLEMENTARY TABLE S1. ANTIBODY USED IN WESTERN BLOTS AND IMMUNOPRECIPITATION

| <i>Protein</i>              | <i>Assay</i> | <i>Source</i>     |                | <i>Dilution</i> |
|-----------------------------|--------------|-------------------|----------------|-----------------|
| AFP                         | IF           | Thermo            | PA5-21004      | 1:100           |
| ALP                         | FC           | R&D Systems       | AF2910         | 1:200           |
| Apc                         | WB           | Thermo            | MA1-72530      | 1:1,000         |
| β-Catenin                   | WB           | Abcam             | ab19381        | 1:1,000         |
| Bap1                        | WB           | Cell signaling    | #13187         | 1:1,000         |
| Bnip3                       | WB           | Abcam             | ab38621        | 1:200           |
| Cisd2                       | WB           | Abcam             | ab167109       | 1:1,000         |
| Hax1                        | WB           | Abcam             | ab78939        | 1:500           |
| Dab2                        | WB           | Cell signaling    | #12906         | 1:1,000         |
| Dkk1                        | WB           | Abcam             | ab61275        | 1:1,000         |
| EP300                       | WB           | Thermo            | MA1-16622      | 1:250           |
| Fos1                        | WB           | Abcam             | ab65051        | 1:500           |
| Gimap5                      | WB, IP       | Novus Biologicals | H00055340-D01P | 1:1,000         |
| Jun                         | WB           | Cell signaling    | #9165          | 1:2,000         |
| Kremen                      | WB           | GeneTex           | GTX53210       | 1:500           |
| Mcam                        | WB           | Cell signaling    | #13475         | 1:1,000         |
| Nestin                      | IF           | Abcam             | ab81755        | 1:2,000         |
| p-β-Catenin                 | WB           | Abcam             | ab24913        | 1:1,000         |
| PCNA                        | WB           | Abcam             | ab140877       | 1:1,000         |
| Runx2                       | WB           | Cell signaling    | #8486          | 1:2,000         |
| SMA                         | IF           | Abcam             | ab5694         | 1:100           |
| Sod1                        | WB           | Thermo            | MA5-15520      | 1:1,000         |
| Spp1                        | WB           | Abcam             | ab129433       | 1:200           |
| SSEA1                       | IF           | Cell Signaling    | #4744,         | 1:200           |
| <math>\alpha</math>-Tubulin | WB           | Cell signaling    | #3873,         | 1:2,000         |

FC, flow cytometry; IF, immunofluorescence; IP, immunoprecipitation; WB, western blot.
