# Supplementary material
Source: PubMed Central journal article supplement (PMC4620525)
Supplement: Supp_Table2.pdf [file Supp_Table2.pdf]

SUPPLEMENTARY TABLE S2. PRIMERS USED IN REVERSE TRANSCRIPTION-POLYMERASE CHAIN REACTION

| <i>Gene</i>      | <i>Accession</i> | <i>Forward</i>            | <i>Reverse</i>            |
|------------------|------------------|---------------------------|---------------------------|
| Endo <i>Oct4</i> | NM_013633.3      | CCCTAGGTGAGCCGTCTTTC      | CGAAGTCTGAAGCCAGGTGT      |
| Endo <i>Sox2</i> | NM_011443        | TCATCCCAATTGCACTTCGC      | TCCGGGCTGTTCTTCTGGTT      |
| <i>Nanog</i>     | NM_028016.3      | AGCCGTTGGCCTTCAGATAG      | AAGTCAGAAGGAAGTGAGCCG     |
| <i>ERas</i>      | NM_181548.2      | TGCCCTCATCAGACTGCTA       | TGTAGGCAAAGCCATTCCCC      |
| <i>Rex1</i>      | NM_009556.3      | FAAACGGCAAAGACAAGTGGC     | RTTGAAATCCAGGGAGAAGCG     |
| <i>Dab2</i>      | NM_023118.5      | CTGGGTGTTGACCAGATGGAT     | GCTTCCACAAAAGGGTTCG       |
| <i>Nr0b1</i>     | NM_007430.4      | FAGGGCAGCATCCTCTACAATCTAC | RCTGTGGATCCTTGAGTGTGATCAG |
| <i>Nr5a2</i>     | NM_030676.3      | FGCATGGACTTACAGCTATTGCG   | RTTCTGCTGCTTCAAAGCCCT     |
| <i>Gapdh</i>     | NM_001289726.1   | FGGTCCAGCTTAGGTTTCATCA    | RAGTGATGGCATGGACTGTGGT    |
