# Supplementary material
Source: PubMed Central journal article supplement (PMC4620525)
Supplement: Supp_Table3.pdf [file Supp_Table3.pdf]

SUPPLEMENTARY TABLE S3. PRIMERS USED IN QUANTITATIVE REVERSE  
TRANSCRIPTION-POLYMERASE CHAIN REACTION

| <i>Gene</i>   | <i>Accession</i> | <i>Forward</i>           | <i>Reverse</i>            |
|---------------|------------------|--------------------------|---------------------------|
| <i>Apc</i>    | NM_007462.3      | GCTAGCTATGTCCAGCTCCC     | CTCTTTACTGCCCCGGGAAT      |
| <i>Bap1</i>   | NM_027088.2      | ACATGGCAGCTTCCTGACTC     | GCTTCTTCCCAACGAGGACA      |
| <i>Bmp2</i>   | NM_007553.3      | TGCTTCTTAGACGGACTGCG     | CTGGGAAGCAGCAACTA         |
| <i>Bmp4</i>   | NM_007554.2      | CCCGGAAGCTAGGTGAGTTC     | AATCCCATCAGGGACGGAGA      |
| <i>Bnip3</i>  | NM_009760.4      | AAATTAAGGGTGCGTGCGG      | CAAAGTGGGGTTCGTGGGTA      |
| <i>Cisd2</i>  | NM_025902.3      | AAGCTCTTTAGGCCCGAGTG     | TGATGATGCTTCCTGCCCTG      |
| <i>Dab2</i>   | NM_023118.5      | ACTCTGAAATCGACACCAATCA   | CAGGCAAGAAGGATGCCCTGA     |
| <i>Ep300</i>  | NM_177821.6      | GACCCTGTCATGCAAAGCCT     | GAAATGATACCTGTTCTGGTAACTG |
| <i>En2</i>    | NM_010134.3      | TCCTACGCAGCCTCTCTTCT     | CAGGGGTTCATCGACACAGAC     |
| <i>Fgf5</i>   | NM_010203.5      | AGTCAATGGCTCCCACGAAG     | TACAATCCCCTGAGACACAGC     |
| <i>Fzd5</i>   | NM_022721.3      | CACAGGTACCTAGCTTGTCGT    | TGATTAGGGCTCCGACTCCA      |
| <i>Fosl1</i>  | NM_010235.2      | TCATCTGGAGAGGTGGGTCC     | CTGCGGTTCTGACTCACTCG      |
| <i>Gata6</i>  | NM_010258.3      | TCAGGGGTAGGGGCATCAG      | GTAGAGGCCGTCTTGACCTG      |
| <i>Hax1</i>   | NM_011826.4      | AGCATCTTCAGCGAGATGGG     | GCAGTCTCTCACCAGGTGTT      |
| <i>Hnf4a</i>  | NM_008261.2      | GGATATGGCCGACTACAGCG     | AGATGGGGACGTGTCATTGC      |
| <i>Jun</i>    | NM_010591.2      | GCACATCACCCTACACCGA      | GGGAAGCGTGTCTGGCTAT       |
| <i>Lef1</i>   | NM_010703.4      | CCTGGCATTCCGACATTCCC     | GGTCAAAGCAAAGAGCTGCC      |
| <i>Mcam</i>   | NM_023061.2      | GTGTGTACCTTGGTGCTTGC     | ATCACTCTTACGAGTCGGGG      |
| <i>MKi67</i>  | NM_001081117.2   | CCAAGGCCCAAGTTTGATGC     | GACTTGGCCCCGAGATGTAG      |
| <i>c-Myc</i>  | NM_010849.4      | GTTGGAAACCCCGCAGACAG     | ATAGGGGTGTACGGAGTCGT      |
| <i>Ncam1</i>  | NM_001081445.1   | AGAGGACGGGAACTCCATCA     | GAGCGCTCTGTACTTGACCA      |
| <i>Olig2</i>  | NM_016967.2      | GCTTAGATCATCCCTGGGGC     | AGATCATCGGGTCTGGGGA       |
| <i>PCNA</i>   | NM_011045.2      | TGGTAGTTGTCGCTGTAGGC     | ATCAGGCGTGCCTCAAACAT      |
| <i>Runx2</i>  | NM_001146038.2   | AGTCCATGCAGGAATATTTAAGGC | AAGAAGCTTTGCTGACACGGT     |
| <i>Sod1</i>   | NM_011434.1      | GGAACCATCCACTTCGAGCA     | CCCATGCTGGCCTTCAGTTA      |
| <i>Sox7</i>   | NM_011446.1      | AAAGTGTTGGGGTGTGCTGA     | GCAGACATTGGGCAGAGAGT      |
| <i>Sox17</i>  | NM_011441.5      | CCCCAACACTCCTCCCAAAG     | ACAGTAGCGGGTCCAGAATG      |
| <i>Spp1</i>   | NM_001204201.1   | CTGGCAGCTCAGAGGAGAAG     | TTCTGTGGCGCAAGGAGATT      |
| <i>T</i>      | NM_009309.2      | CAAGAACGGCAGGAGGATGT     | GTACATGGCATTGGGGTCCA      |
| <i>Tcf7l1</i> | NM_001079822.2   | GTCGTCCCTGGTCAACGAAT     | ATCCTGGGGCCTTCTCACTT      |
| <i>Tbx3</i>   | NM_011535.3      | CTACGGGGGAGCAATGGATG     | CGCTTGGGAAGGCCAAAGTA      |
| <i>Trp53</i>  | NM_011640.3      | GGCGTAAACGCTTCGAGATG     | CTTCAGGTAGCTGGAGTGAGC     |
