# Supplementary material
Source: PubMed Central journal article supplement (PMC4620525)
Supplement: Supp_Table4.pdf [file Supp_Table4.pdf]

SUPPLEMENTARY TABLE S4. CATEGORIES OF MITOCHONDRIA GENES USED IN QUANTITATIVE POLYMERASE CHAIN REACTION

| <i>Categories</i>                      | <i>Genes</i>                                                                                                              |
|----------------------------------------|---------------------------------------------------------------------------------------------------------------------------|
| 1. Mitochondria localization           | <i>Dnm1l, Lrpprc, Mfn2, Msto1, Nefl, Opa1, Rhot1, Rhot2, Uxt</i>                                                          |
| 2. Fission and fusion                  | <i>Cox10, Cox18, Fis1, Mfn1, Mfn2, Opa1</i>                                                                               |
| 3. Inner membrane translocation        | <i>Timm10b, Imp11, Imp21, Opa1, Taz, Timm10, Timm17a, Timm17b, Timm22, Timm23, Timm44, Timm50, Timm8a1, Timm8b, Timm9</i> |
| 4. Outer membrane translocation        | <i>Tomm20, Tomm22, Tomm34, Tomm40, Tomm40l, Tomm70a</i>                                                                   |
| 5. Mitochondria protein import         | <i>Aip, Cox10, Cox18, Dnajc19, Timm10b, Grpel1, Hspd1, Mipep, Sh3glb1</i>                                                 |
| 6. Membrane polarization and potential | <i>Bak1, Bcl2, Bcl2l1, Bnip3, Sod1, Trp53, Ucp1, Ucp2, Ucp3</i>                                                           |
